# Supplementary material for: A Structure‐Aware Adversarial Framework with the Keypoint Biorientation Field for Multiperson Pose Estimation
Source: Hindawi journal article supplement (doi:10.1155/2022/3447827), 2022-01-01
Supplement: f1 [file 3447827.f1.docx]

# Wireless Communications and Mobile Computing

# A Structure-aware Adversarial Framework with Keypoints Bi-Orientation Field for Multi-Person Pose Estimation

**Supplementary Material**

Xianjia Meng1, Yong Yang1, Kang Li1, and Zuobin Ying2

1 School of Information Science and Technology, Northwest University, Xi’an 710119, China.

2 Institute of Data Science, City University of Macau, Macao, Macao.

In the Supplementary Material we:

Appendix A: Provide detailed description for KBOF.

## A Detailed Description of KBOF

We have further elaborated on the Keypoints Bi-Orientation Field for the keypoints associa-tion in chapter 3.1.4. to understand its functions in more detail. The right sub-picture in Fig. A.1 shows the direction information of the elbow pointing to the wrist, and the left sub-picture shows the direction information of the wrist pointing to the elbow. Specifically the two vectors with opposite directions in Fig. A.1, abstractly represent the part of the Keypoints Orientation Field with the elbow pointing to the wrist and the part of the Keypoints Orientation Field with the wrist pointing to the elbow, respectively. The pair of direction vectors constitutes Keypoints Bi-Orientation Field.


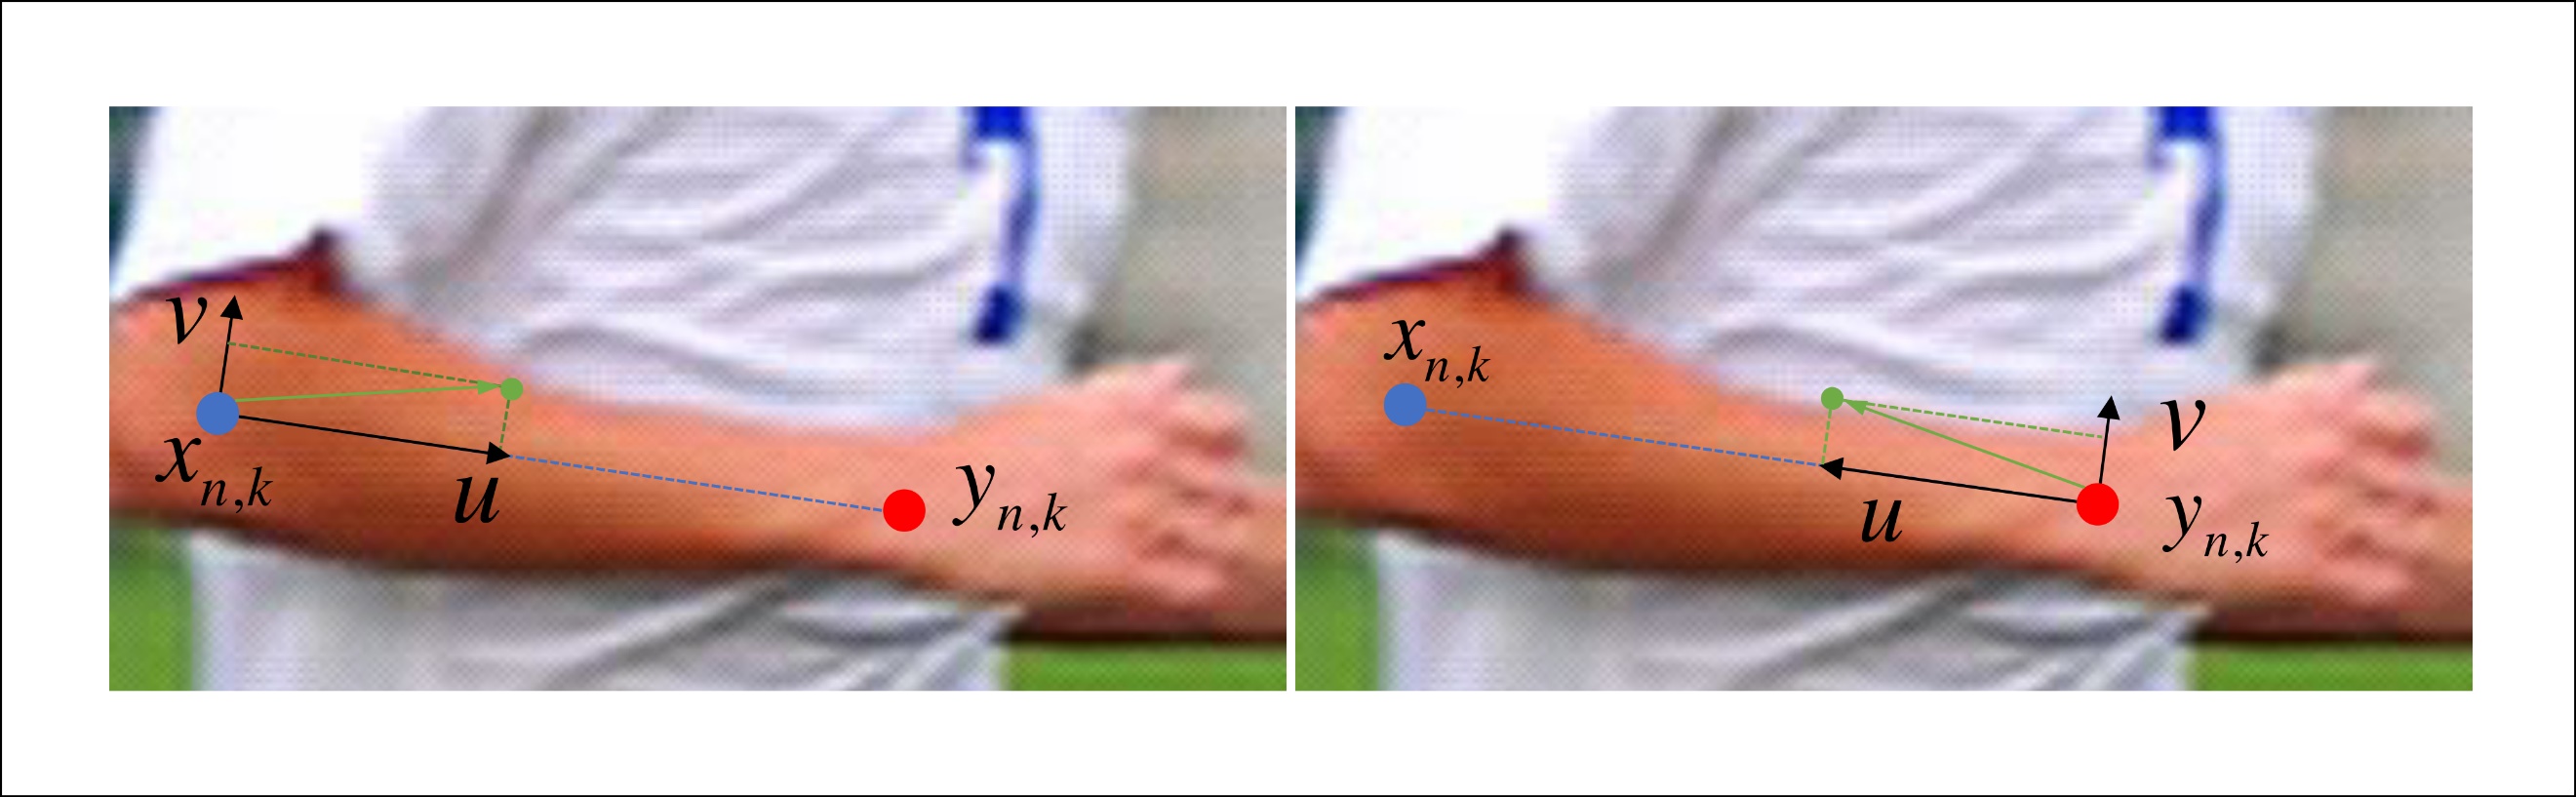


Figure S.1: A pair of unit vectors has opposite directions between the joint points.
